# Supplementary material for: In Vitro Antifungal Activity and Toxicity of Dihydrocarvone-Hybrid Derivatives against Monilinia fructicola
Source: MDPI journal article supplement (doi:10.3390/antibiotics10070818), 2021-07-06

Communication

# In Vitro Antifungal Activity and Toxicity of Dihydrocarvone-Hybrid Derivatives against *Monilinia fructicola*

Katy Díaz <sup>1</sup>, Enrique Werner <sup>2</sup>, Ximena Besoain <sup>3</sup>, Susana Flores <sup>4</sup>, Viviana Donoso <sup>4</sup>, Bastian Said <sup>5</sup>, Nelson Caro <sup>6</sup>, Ernesto Vega <sup>7</sup>, Iván Montenegro <sup>8</sup> and Alejandro Madrid <sup>4,\*</sup>

<sup>1</sup> Departamento de Química, Universidad Técnica Federico Santa María, Av. España N° 1680, 2340000 Valparaíso, Chile; katy.diaz@usm.cl

<sup>2</sup> Departamento de Ciencias Básicas, Campus Fernando May, Universidad del Bío-Bío. Avda. Andrés Bello 720, casilla 447, 3780000 Chillán, Chile; ewerner@ubiobio.cl

<sup>3</sup> Escuela de Agronomía, Pontificia Universidad Católica de Valparaíso, San Francisco s/n La Palma, 2260000 Quillota, Chile; ximena.besoain@pucv.cl

<sup>4</sup> Laboratorio de Productos Naturales y Síntesis Orgánica (LPNSO), Departamento de Química, Facultad de Ciencias Naturales y Exactas, Universidad de Playa Ancha, Avda. Leopoldo Carvallo 270, Playa Ancha, 2340000 Valparaíso, Chile; susana.flores@upla.cl (S.F.); cadonoso@utalca.cl (V.D.)

<sup>5</sup> Departamento de Química, Universidad Técnica Federico Santa María, Av. Santa María 6400, 7630000 Santiago, Chile; bastian.said@usm.cl

<sup>6</sup> Centro de Investigación Australbiotech, Universidad Santo Tomás, Avda. Ejército 146, 8320000 Santiago, Chile; ncaro@australbiotech.cl

<sup>7</sup> Departamento Laboratorios y Estaciones Cuarentenarias, Servicio Agrícola y Ganadero, Ruta 68 # (Km. 12), 19100 Pudahuel, Santiago, Chile; ernesto.vega@sag.gob.cl

<sup>8</sup> Escuela de Obstetricia y Puericultura, Facultad de medicina, Universidad de Valparaíso, Angamos 655, 2520000 Reñaca, Viña del Mar, Chile; ivan.montenegro@uv.cl

\* Correspondence: alejandro.madrid@upla.cl; Tel.: +56-(032)-250-0526

**Figure S1: FT-IR,  $^1\text{H}$ ,  $^{13}\text{C}$  NMR and HRMS of compounds 3–8****FT-IR of compounds 3**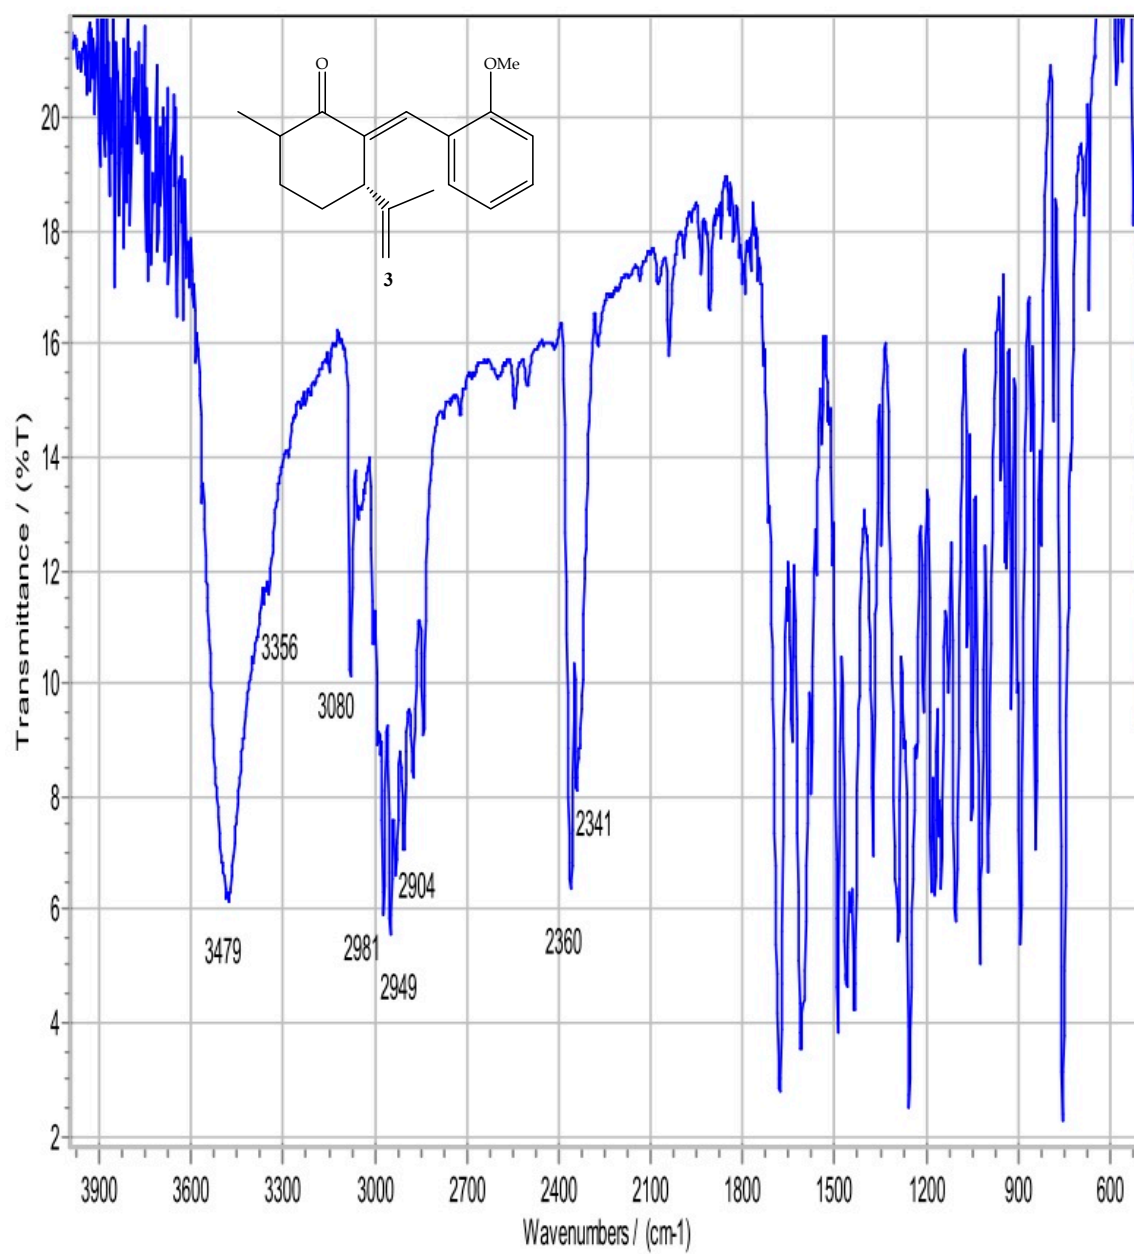

Instrument model=WQF-520 resolution=4 scan times=64

<sup>1</sup>H NMR (400 MHz, CDCl<sub>3</sub>) spectrum of compound 3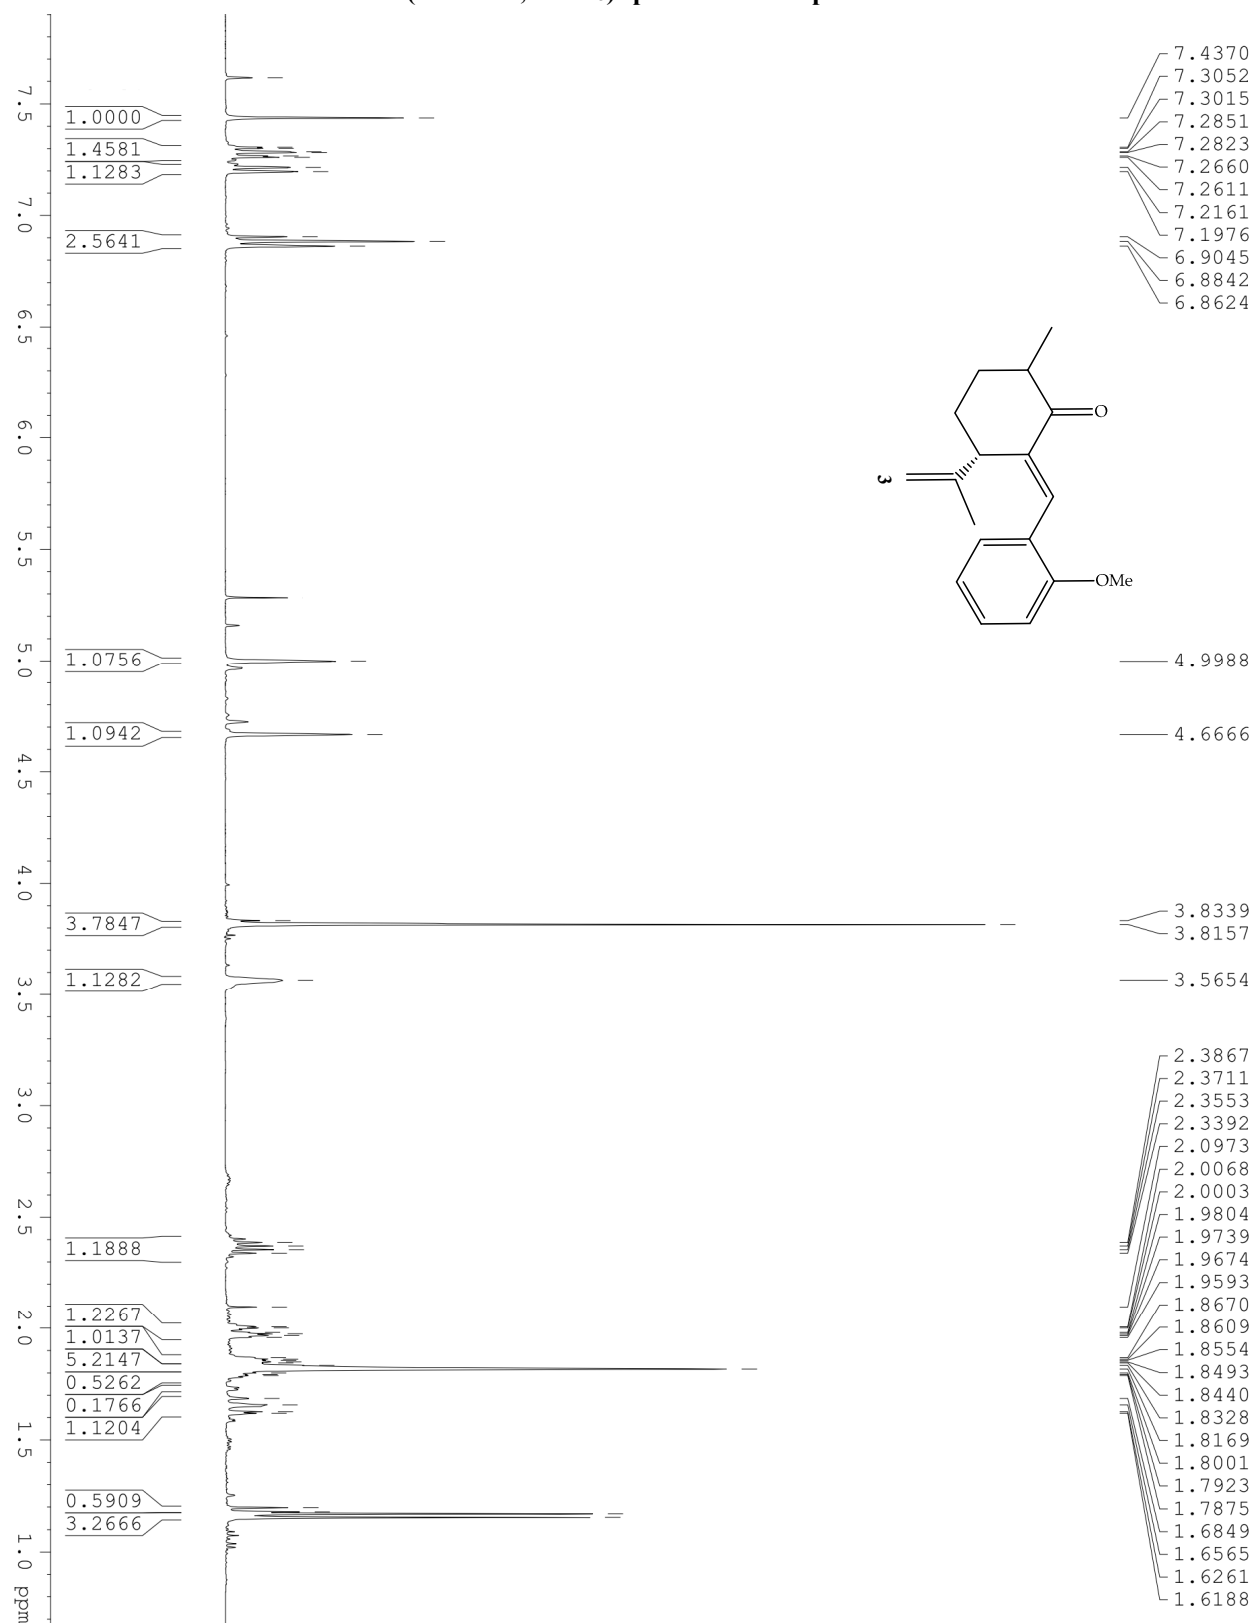

**$^{13}\text{C}$  NMR (100 MHz,  $\text{CDCl}_3$ ) spectrum of compound 3**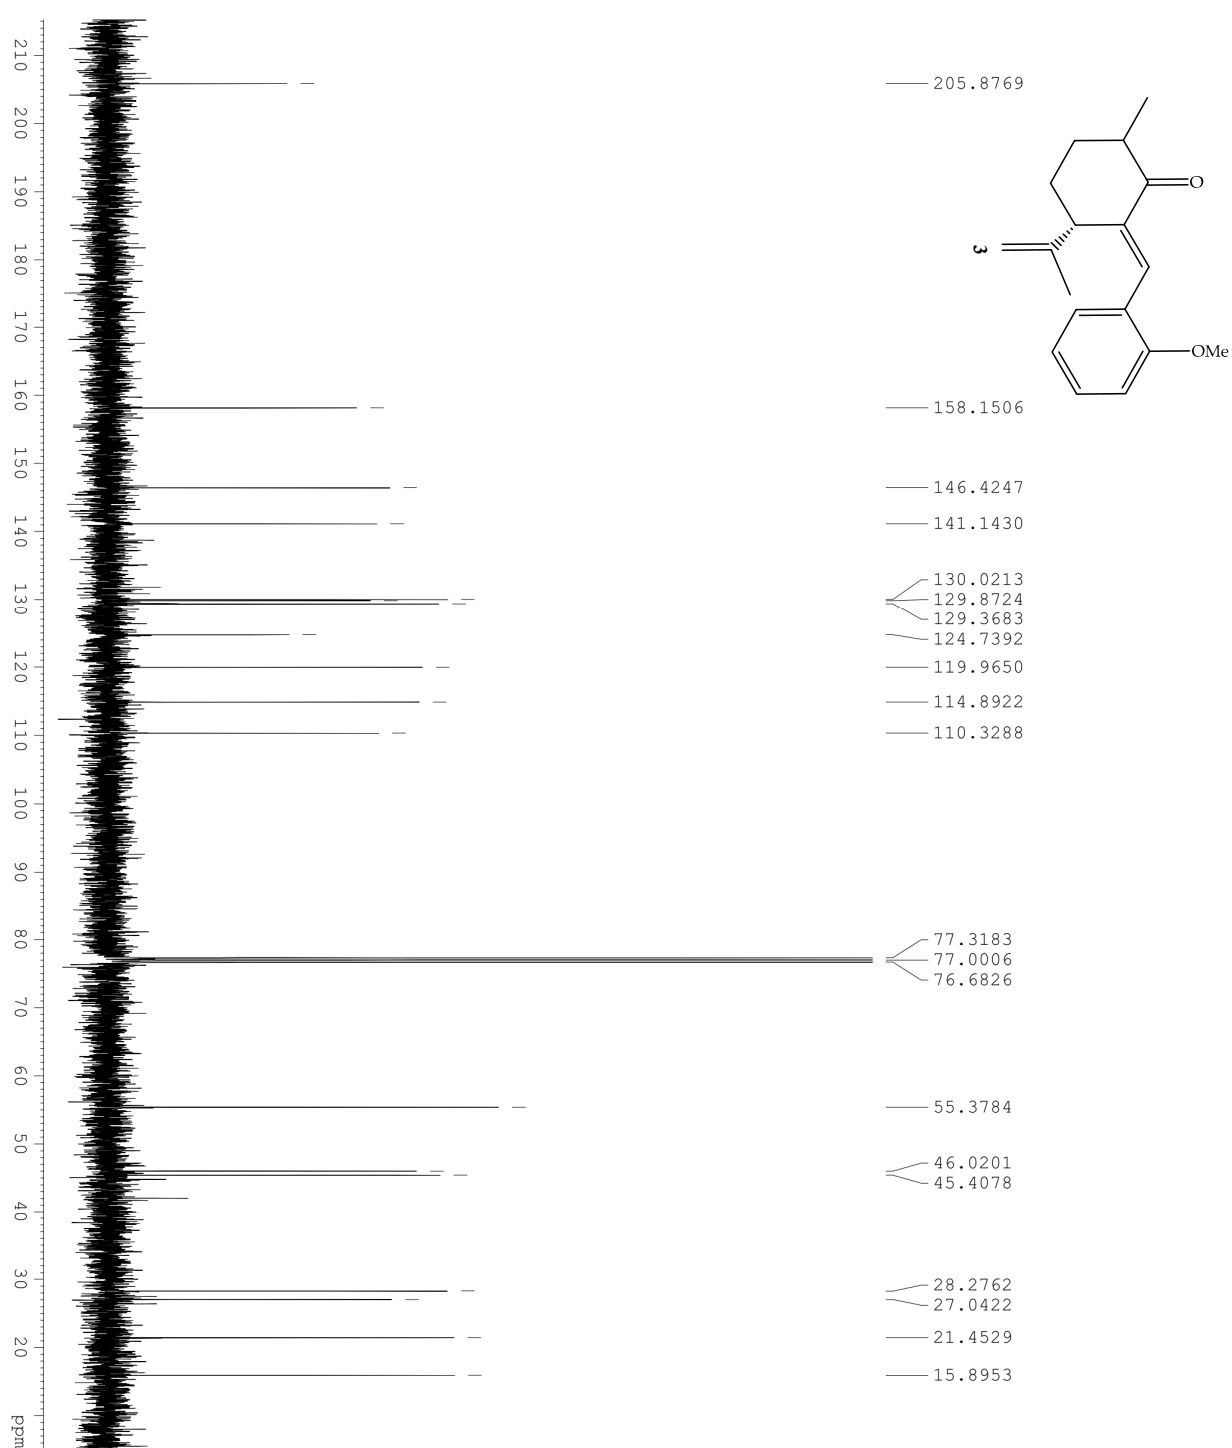

## HRMS of compound 3

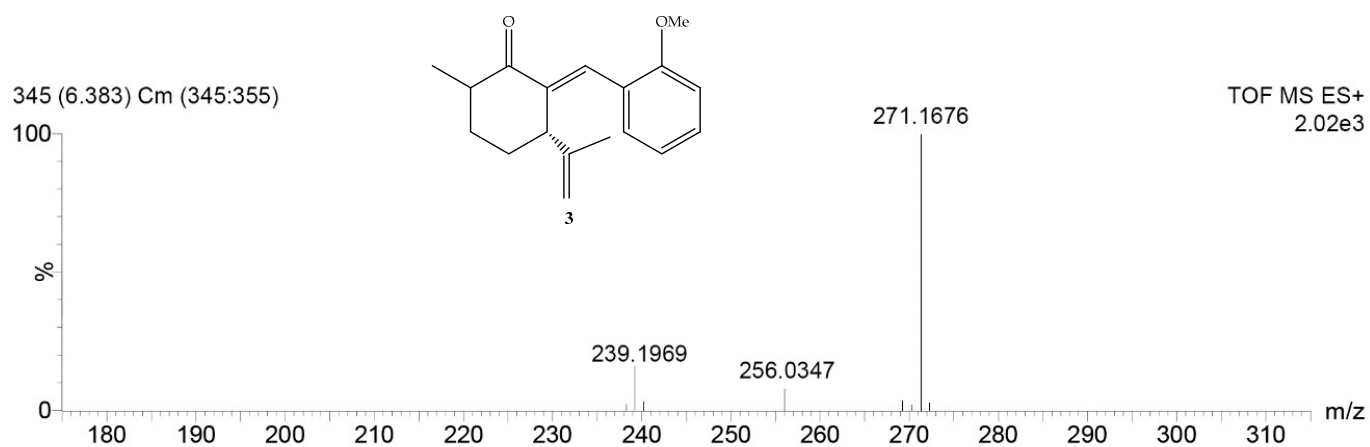

## FT-IR of compounds 4

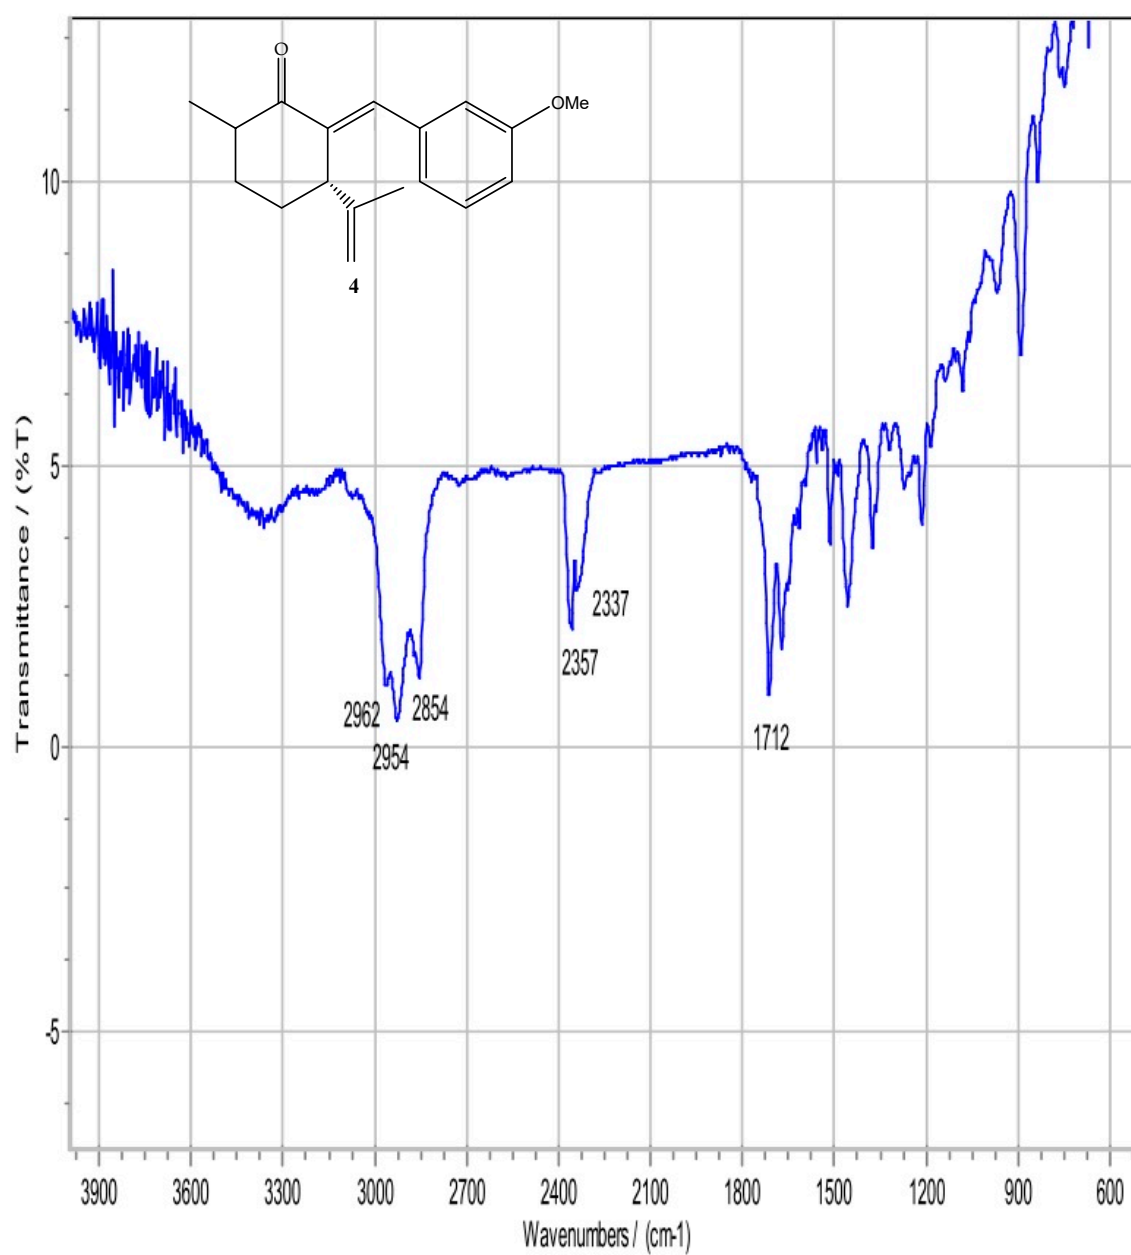

Instrument model=WQF-520 resolution=4 scan times=64

<sup>1</sup>H NMR (400 MHz, CDCl<sub>3</sub>) spectrum of compound 4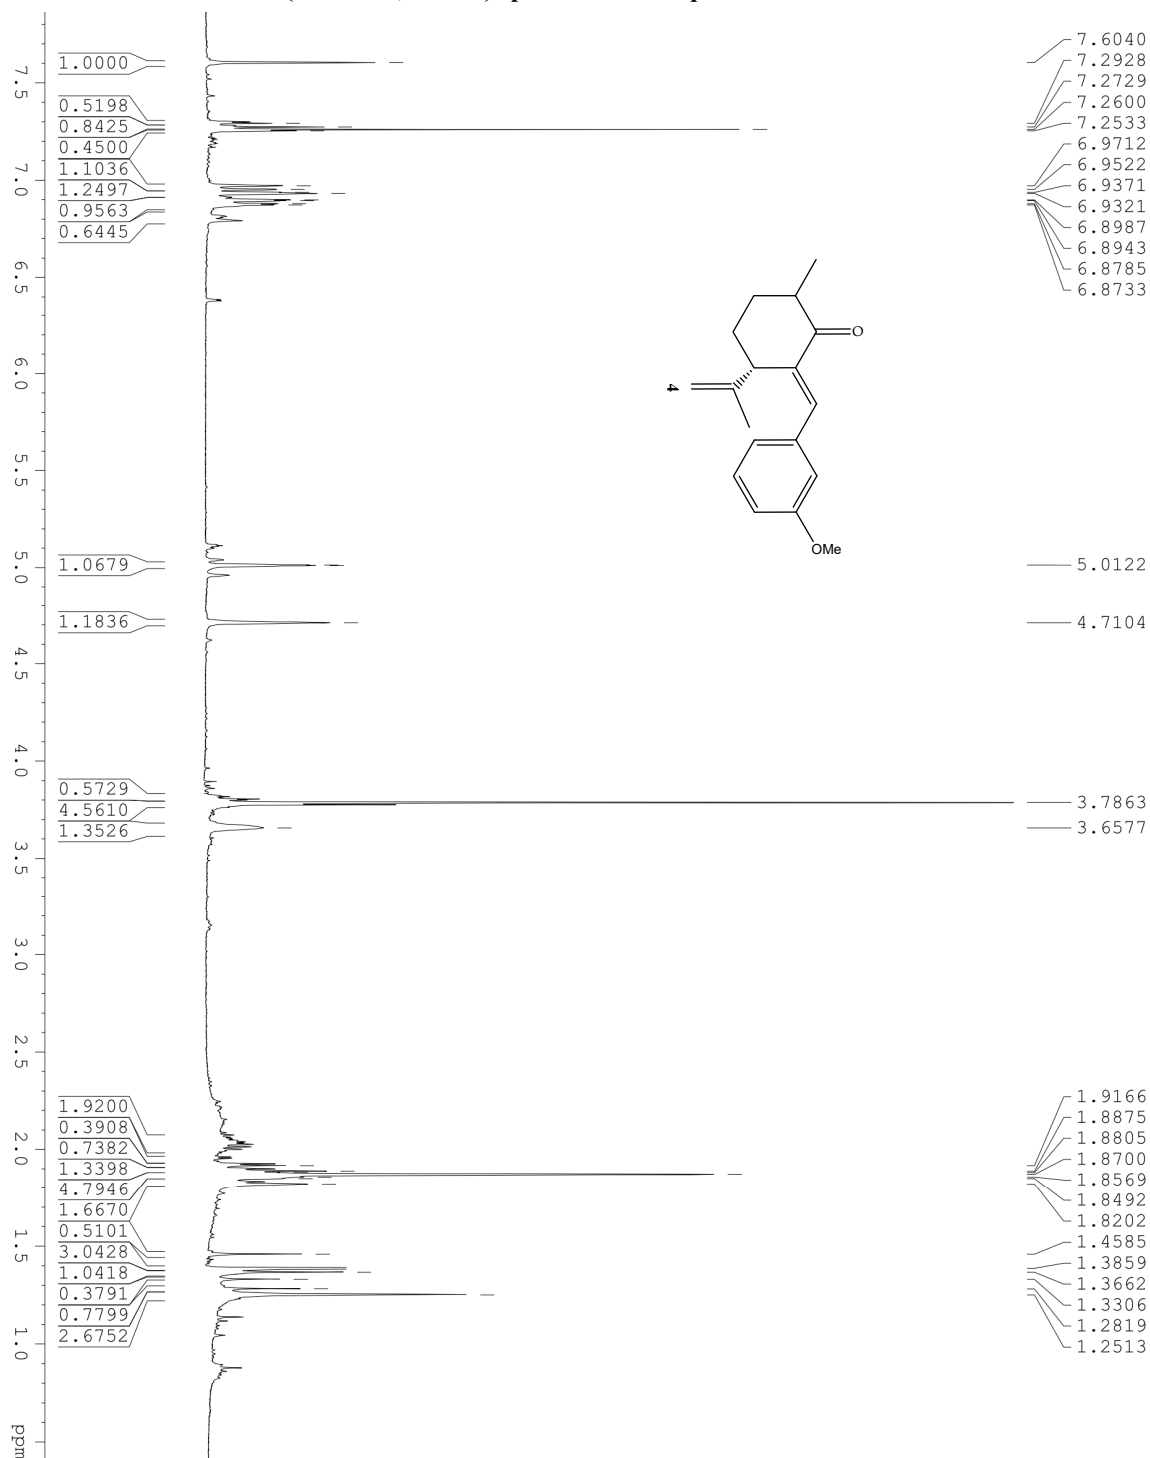

$^{13}\text{C}$  NMR (100 MHz,  $\text{CDCl}_3$ ) spectrum of compound 4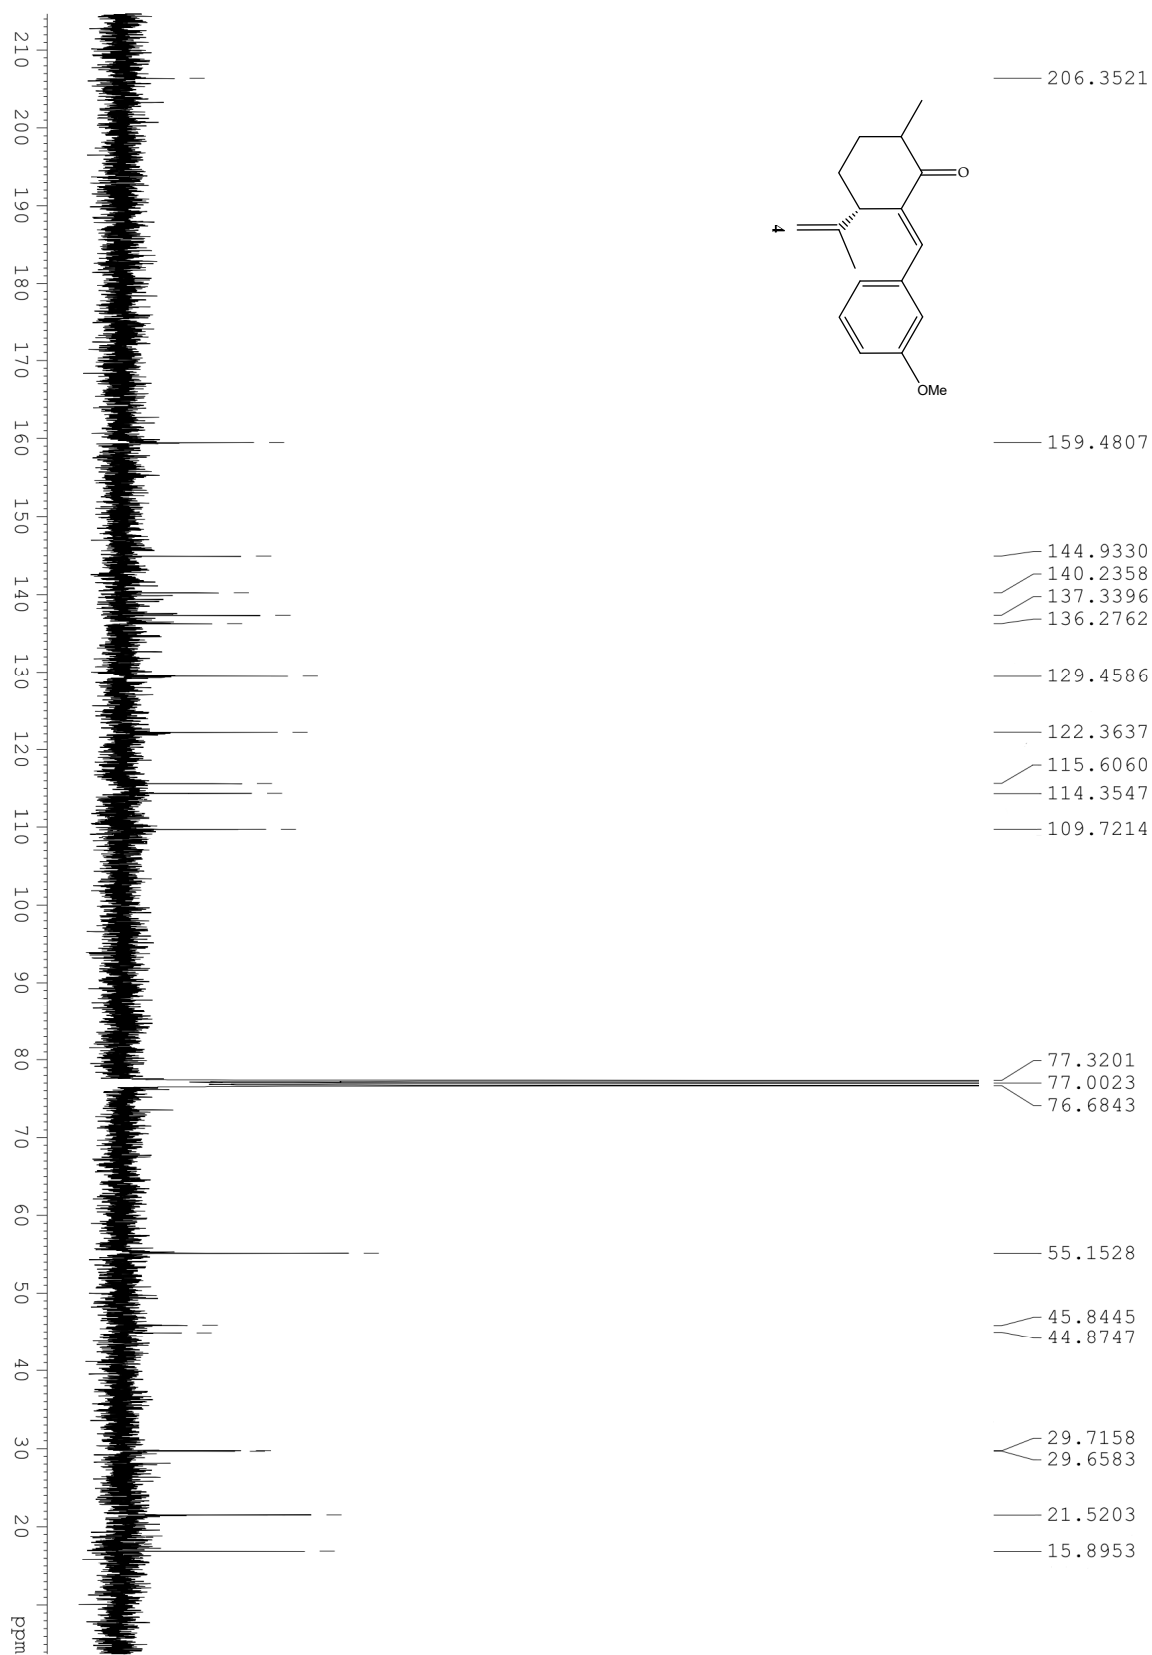



## HRMS of compound 4

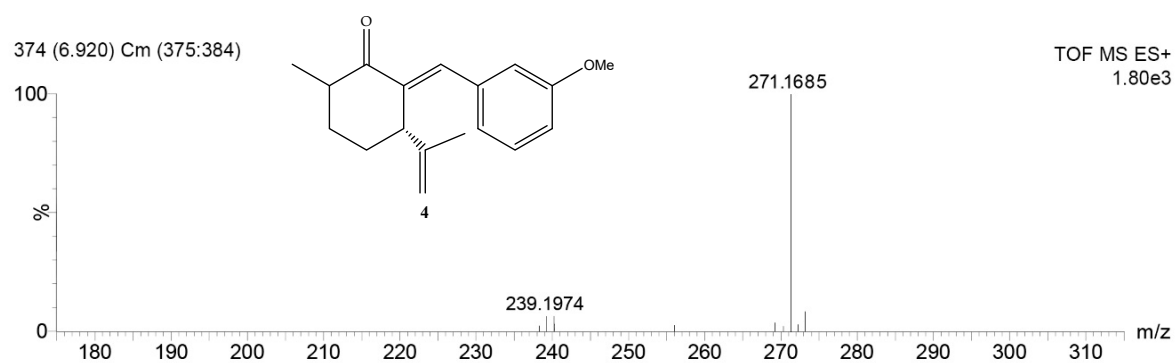

## FT-IR of compounds 5

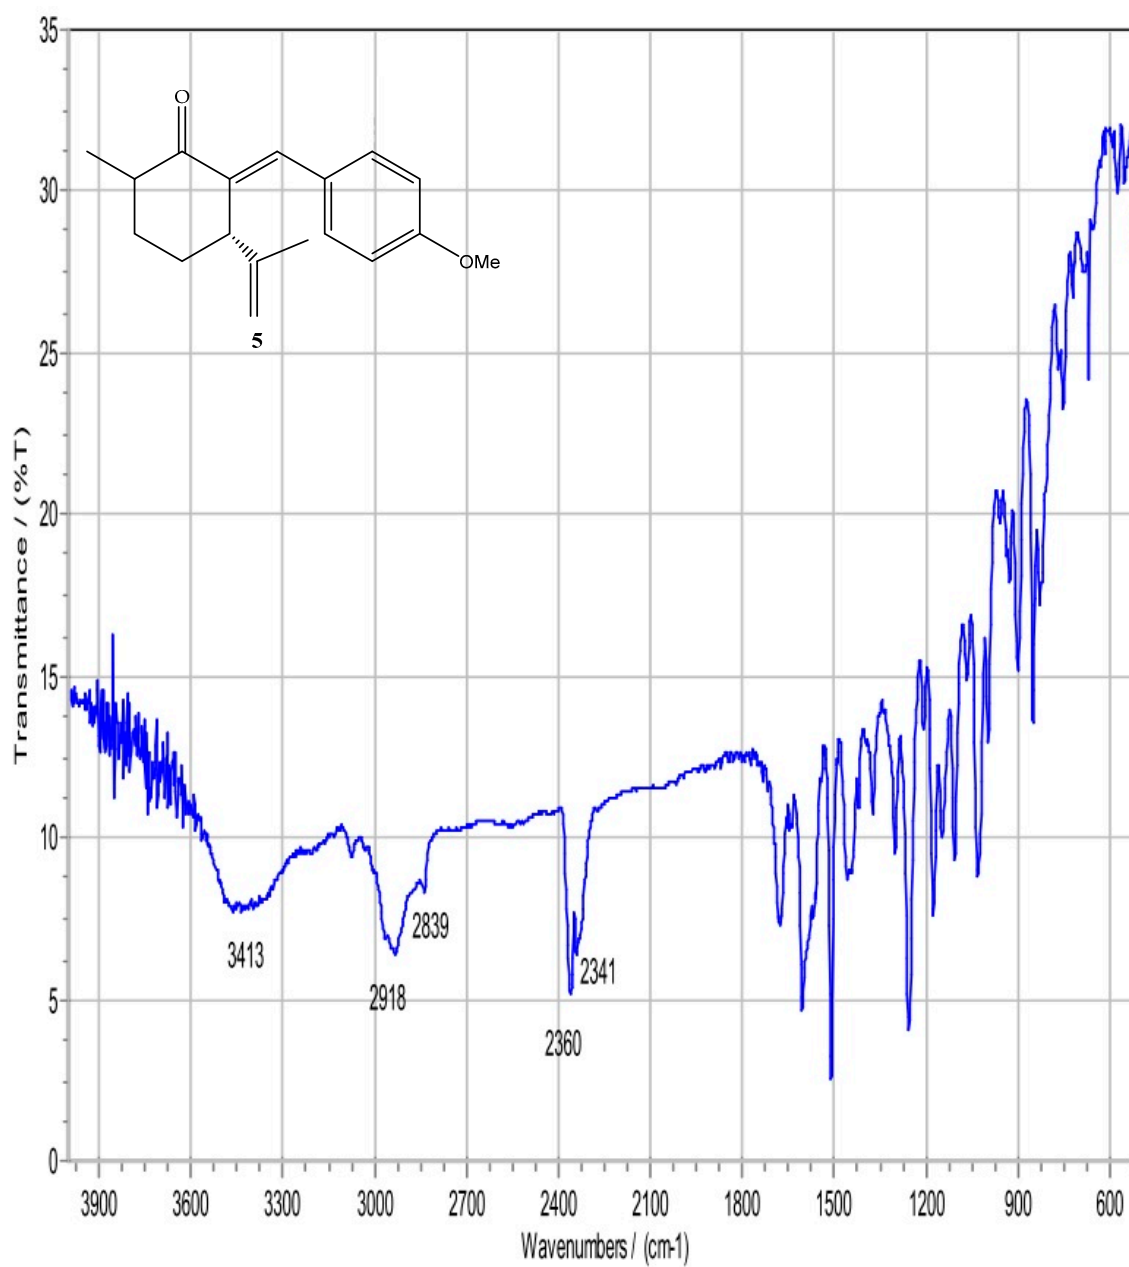

Instrument model=WQF-520 resolution=4 scan times=64

<sup>1</sup>H NMR (400 MHz, CDCl<sub>3</sub>) spectrum of compound 5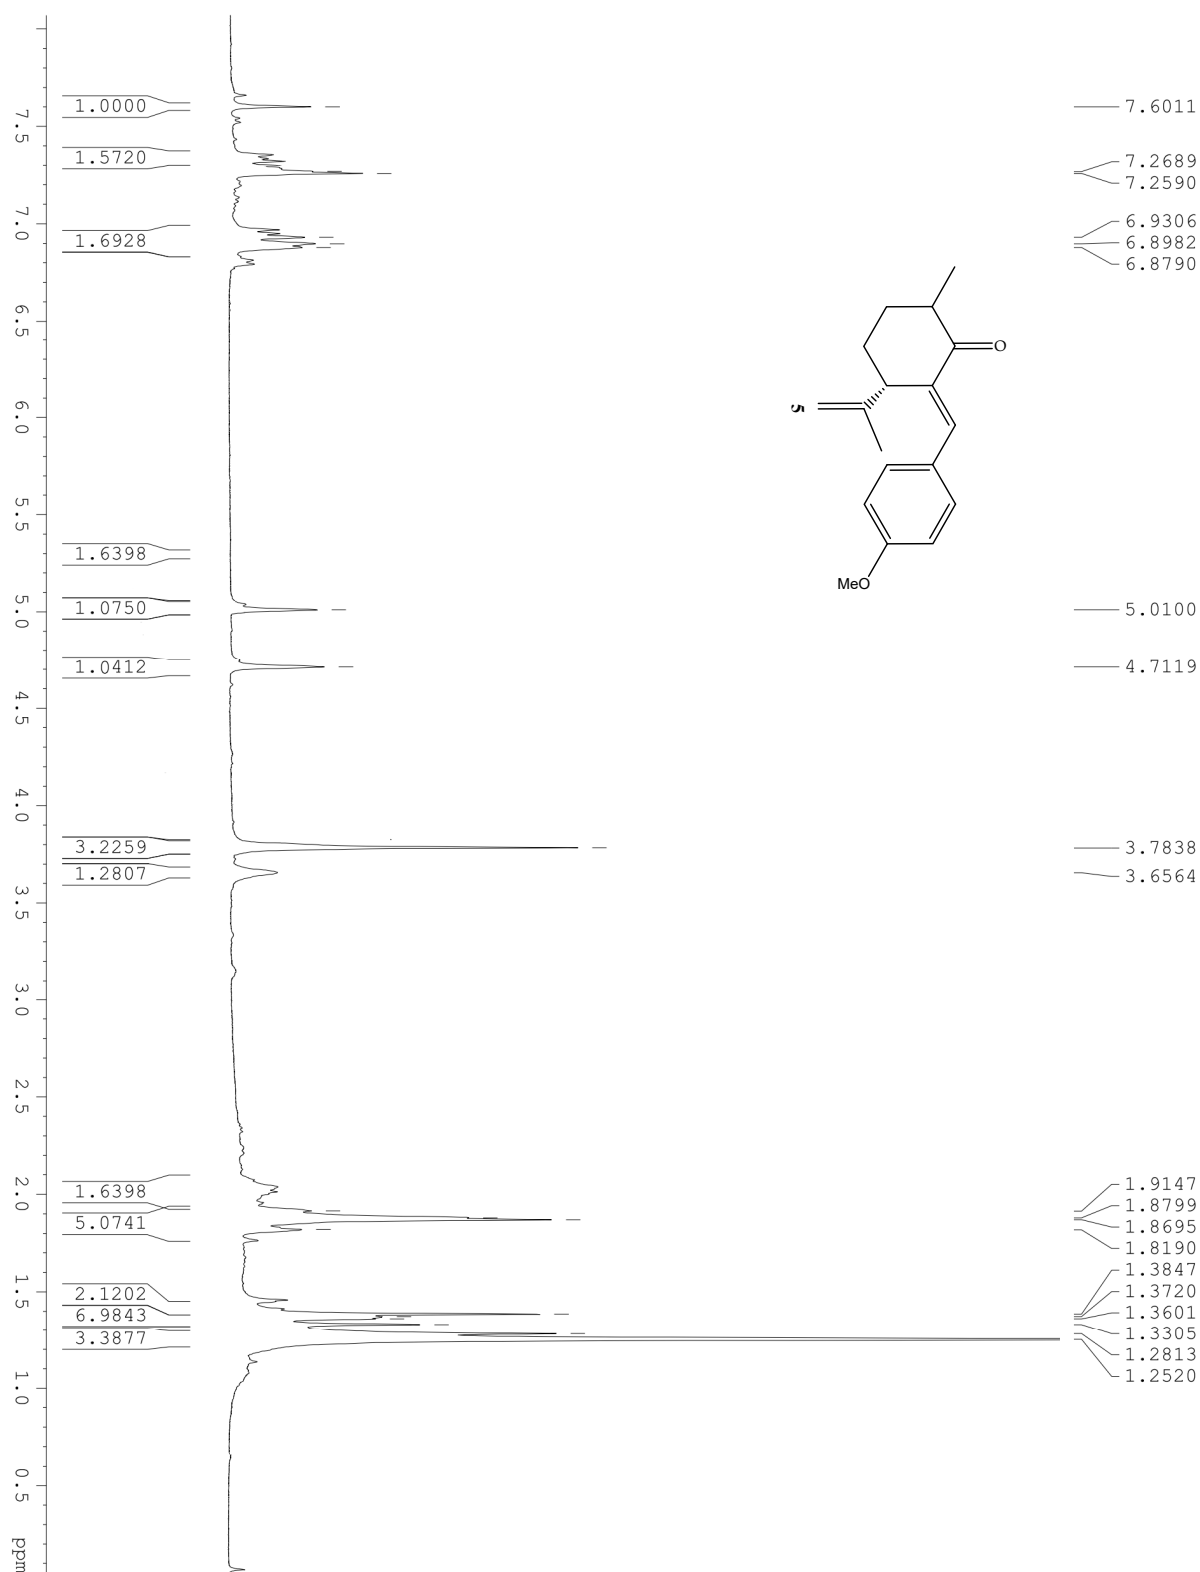

$^{13}\text{C}$  NMR (100 MHz,  $\text{CDCl}_3$ ) spectrum of compound 5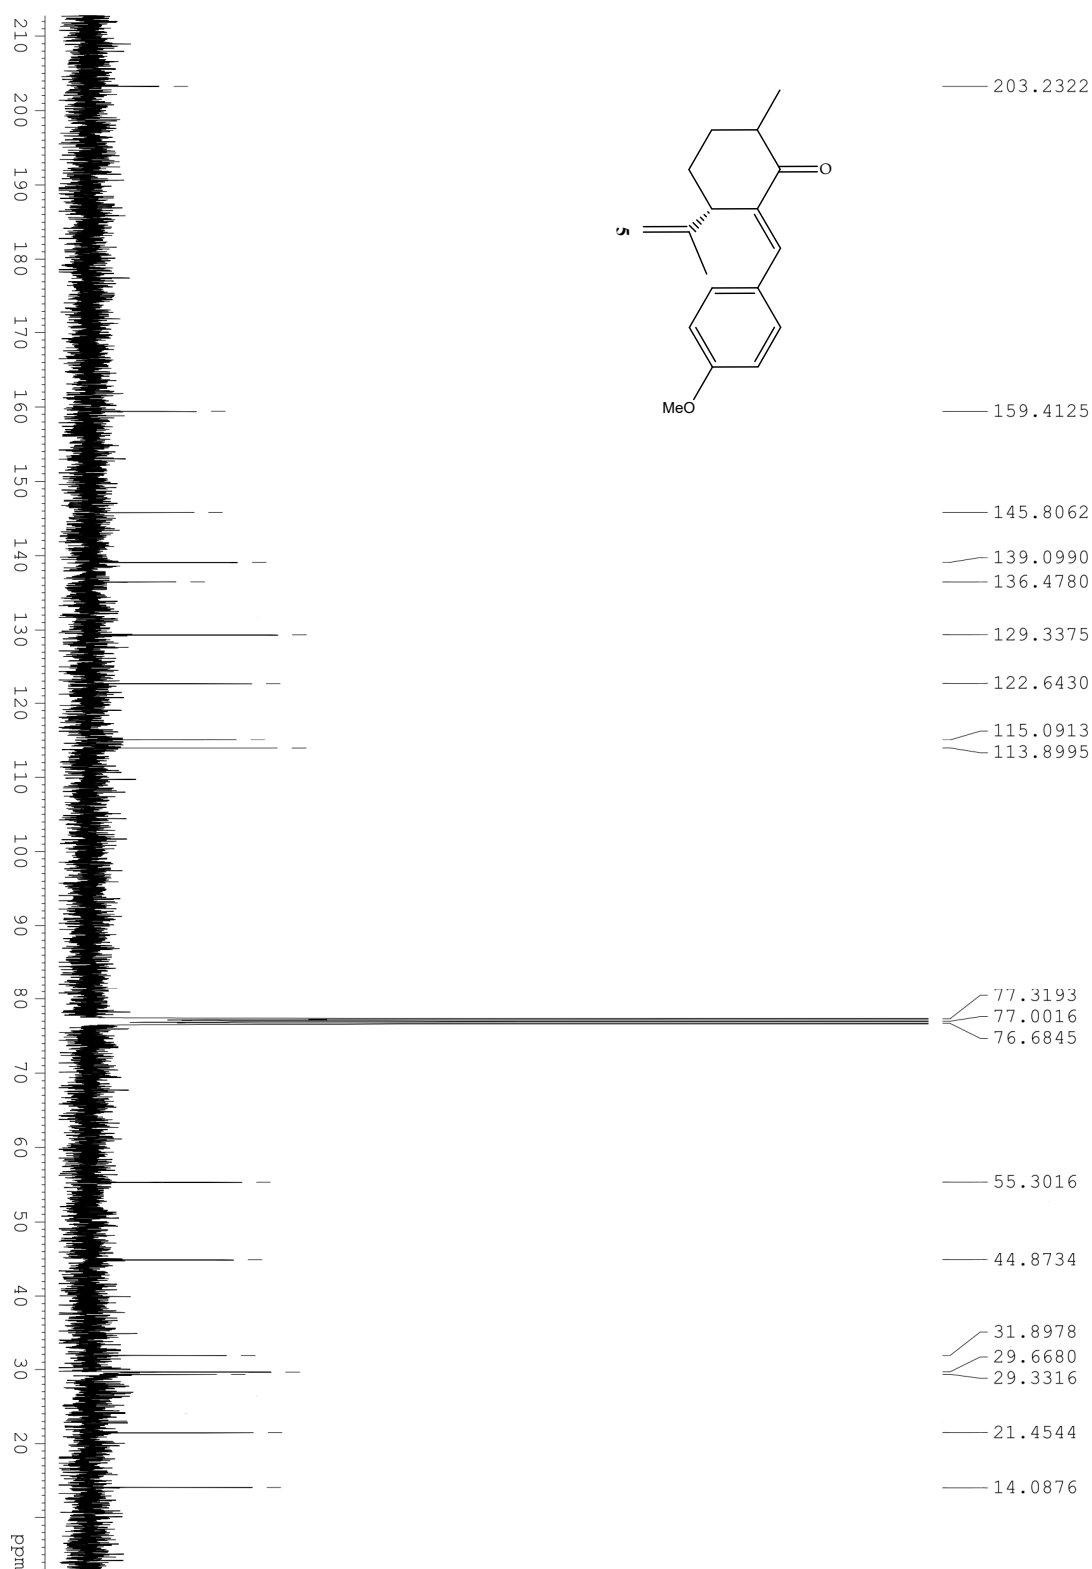

**HRMS of compound 5**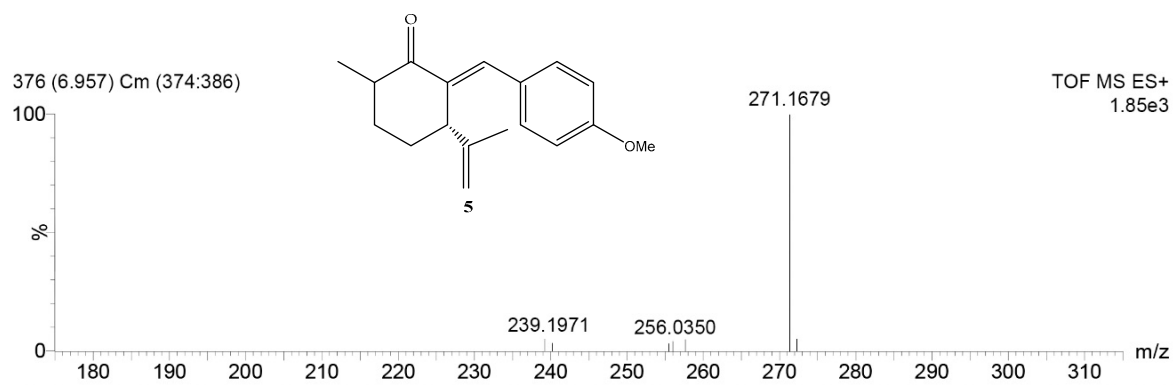

## FT-IR of compounds 6

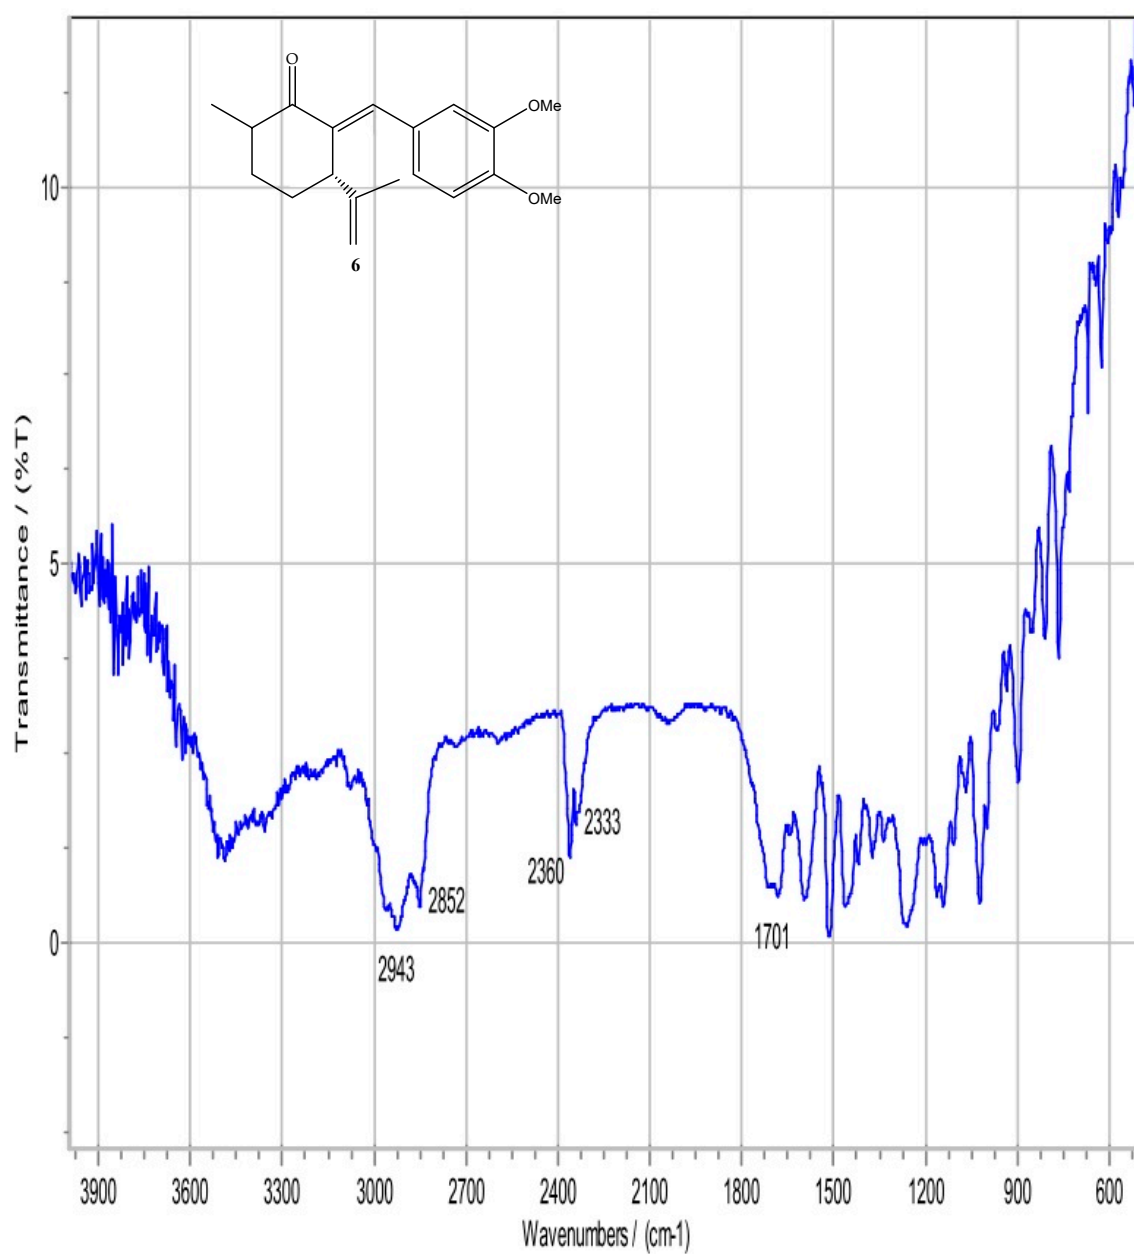

Instrument model=WQF-520 resolution=4 scan times=64

<sup>1</sup>H NMR (400 MHz, CDCl<sub>3</sub>) spectrum of compound 6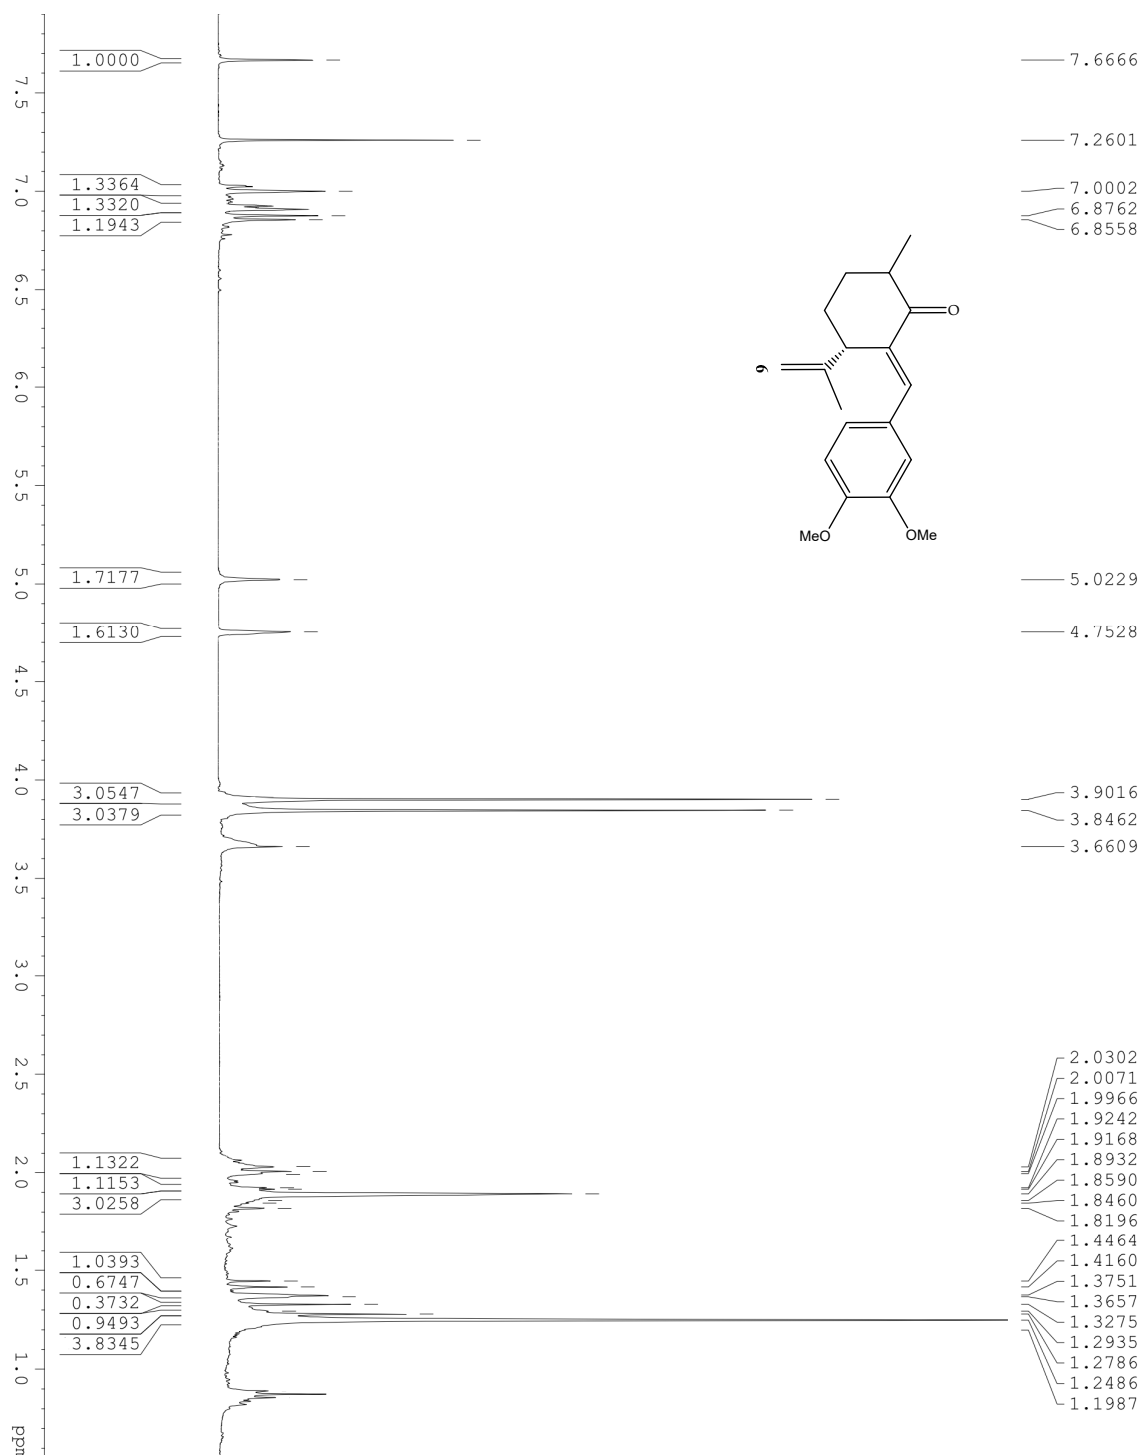

$^{13}\text{C}$  NMR (100 MHz,  $\text{CDCl}_3$ ) spectrum of compound 6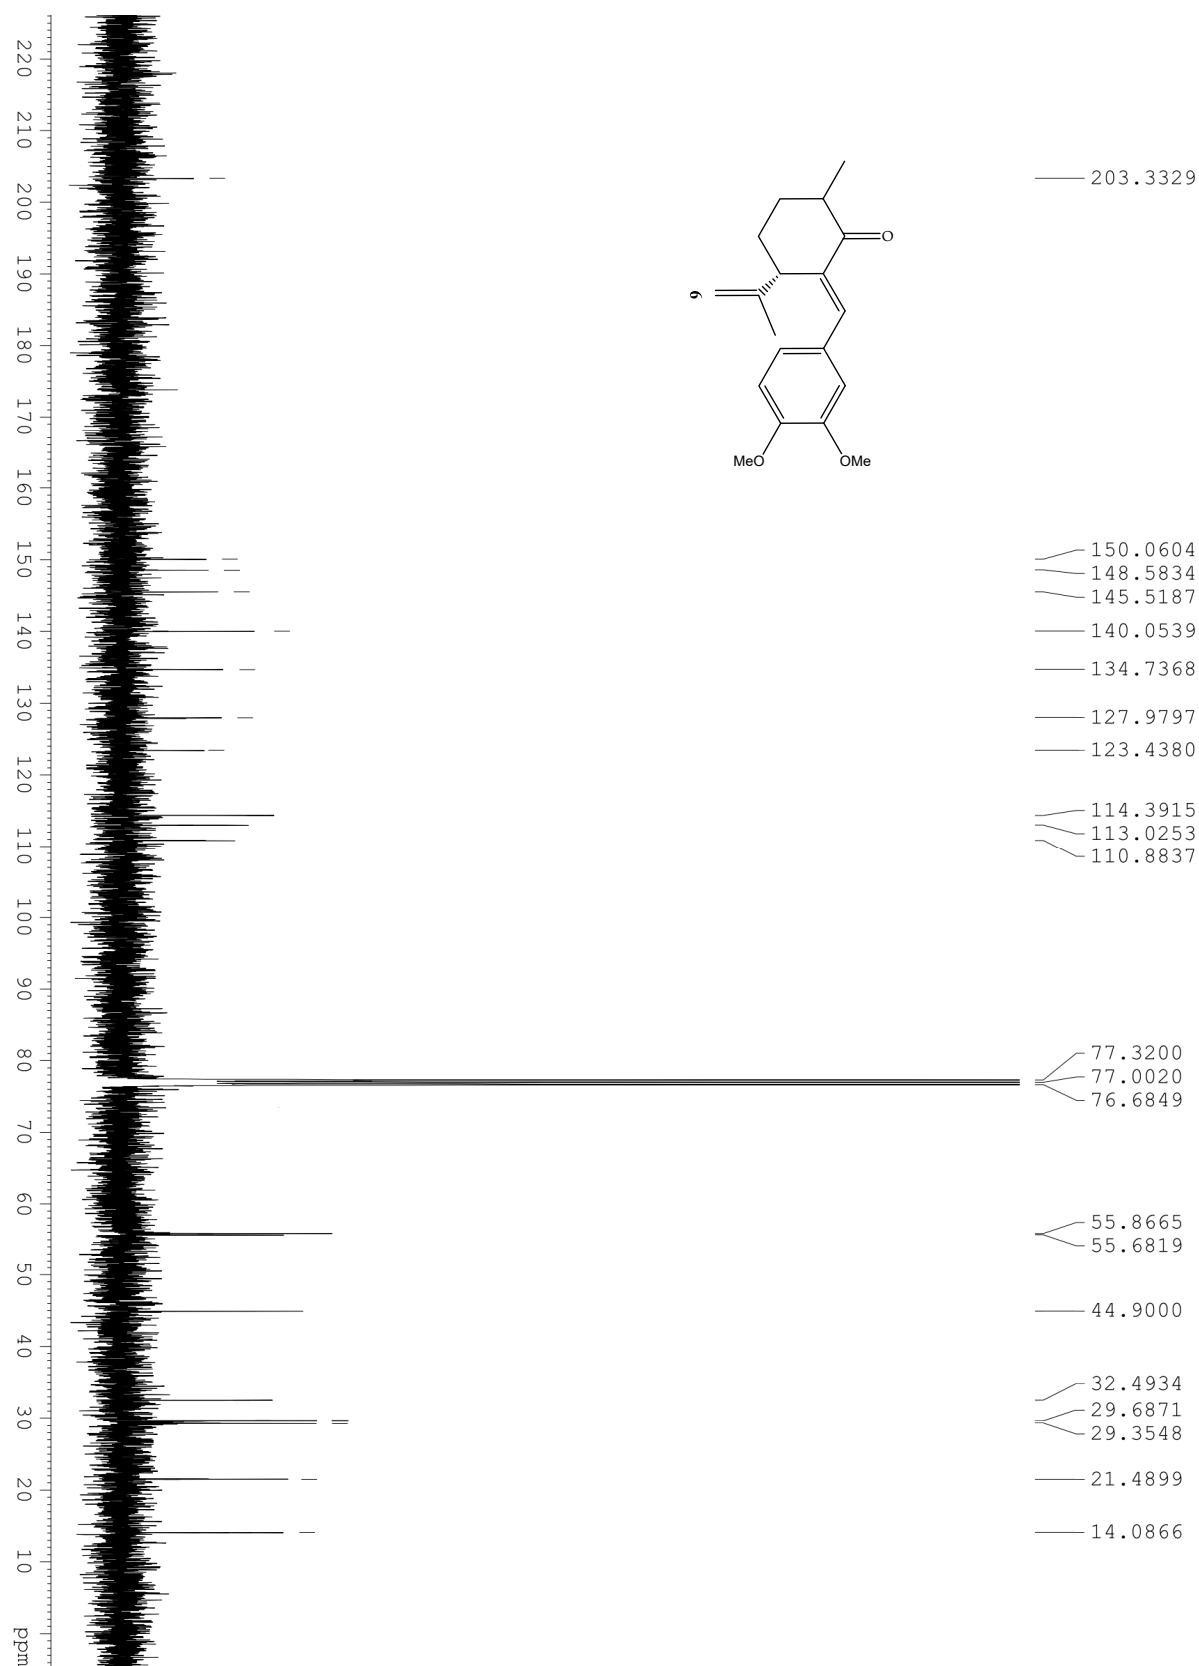



**HRMS of compound 6**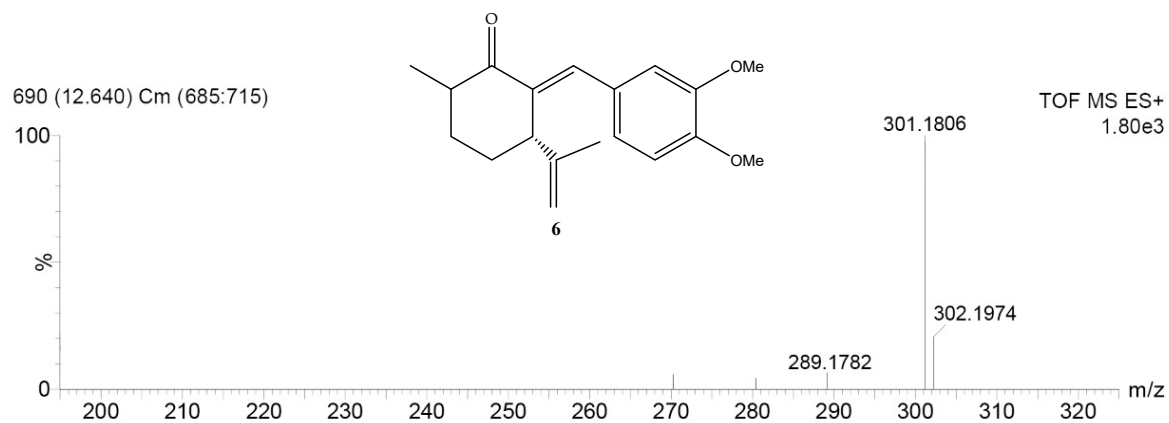

## FT-IR of compounds 7

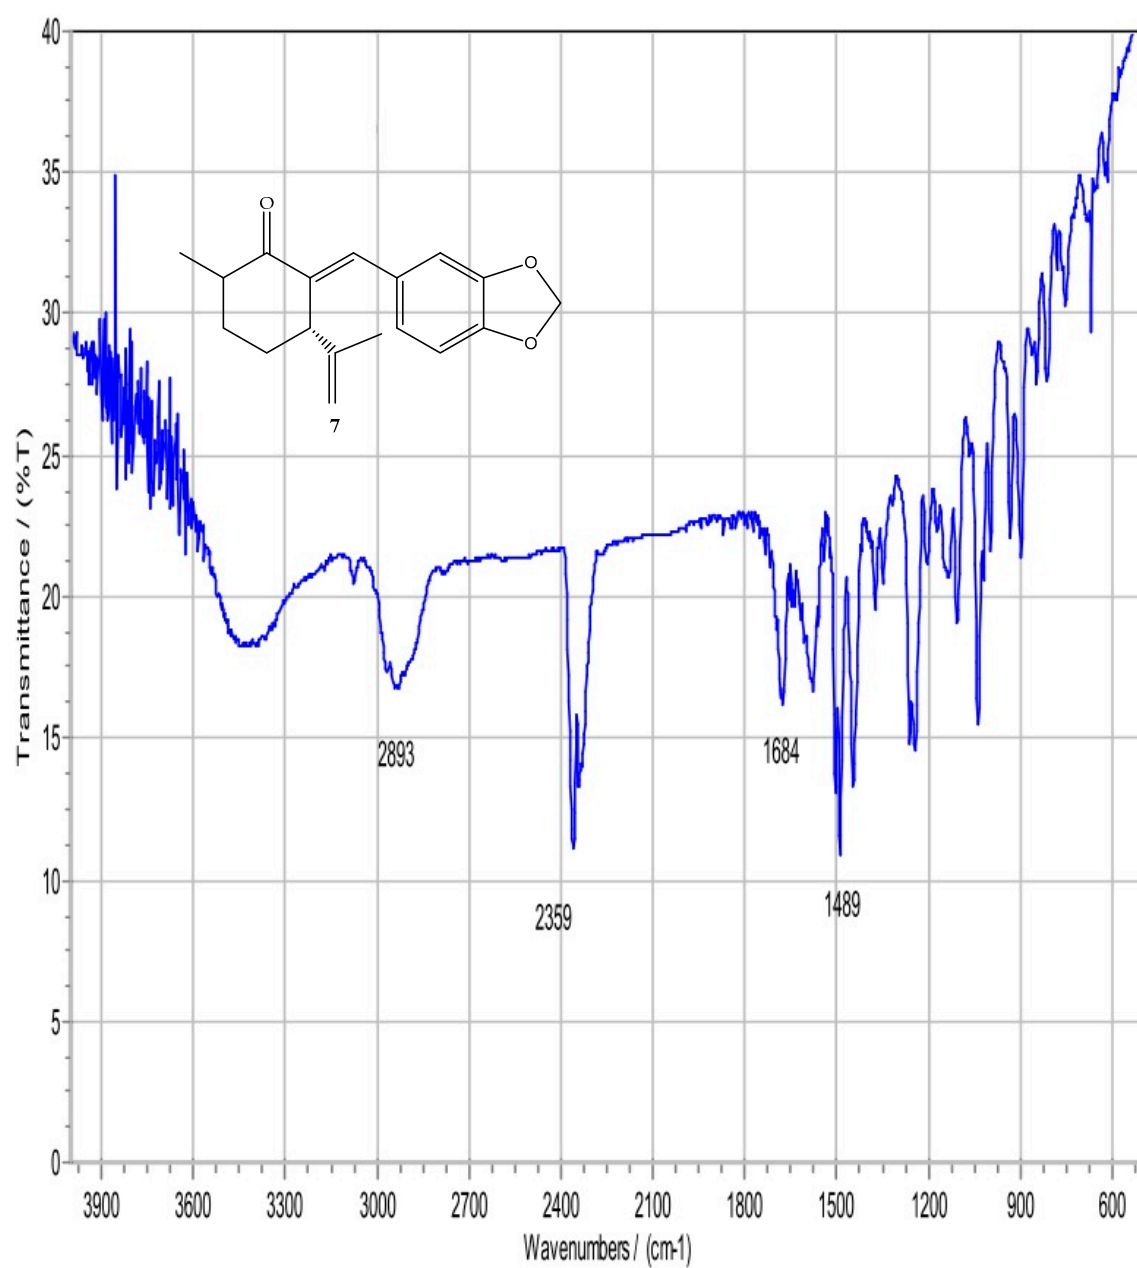

Instrument model=WQF-520 resolution=4 scan times=64

<sup>1</sup>H NMR (400 MHz, CDCl<sub>3</sub>) spectrum of compound 7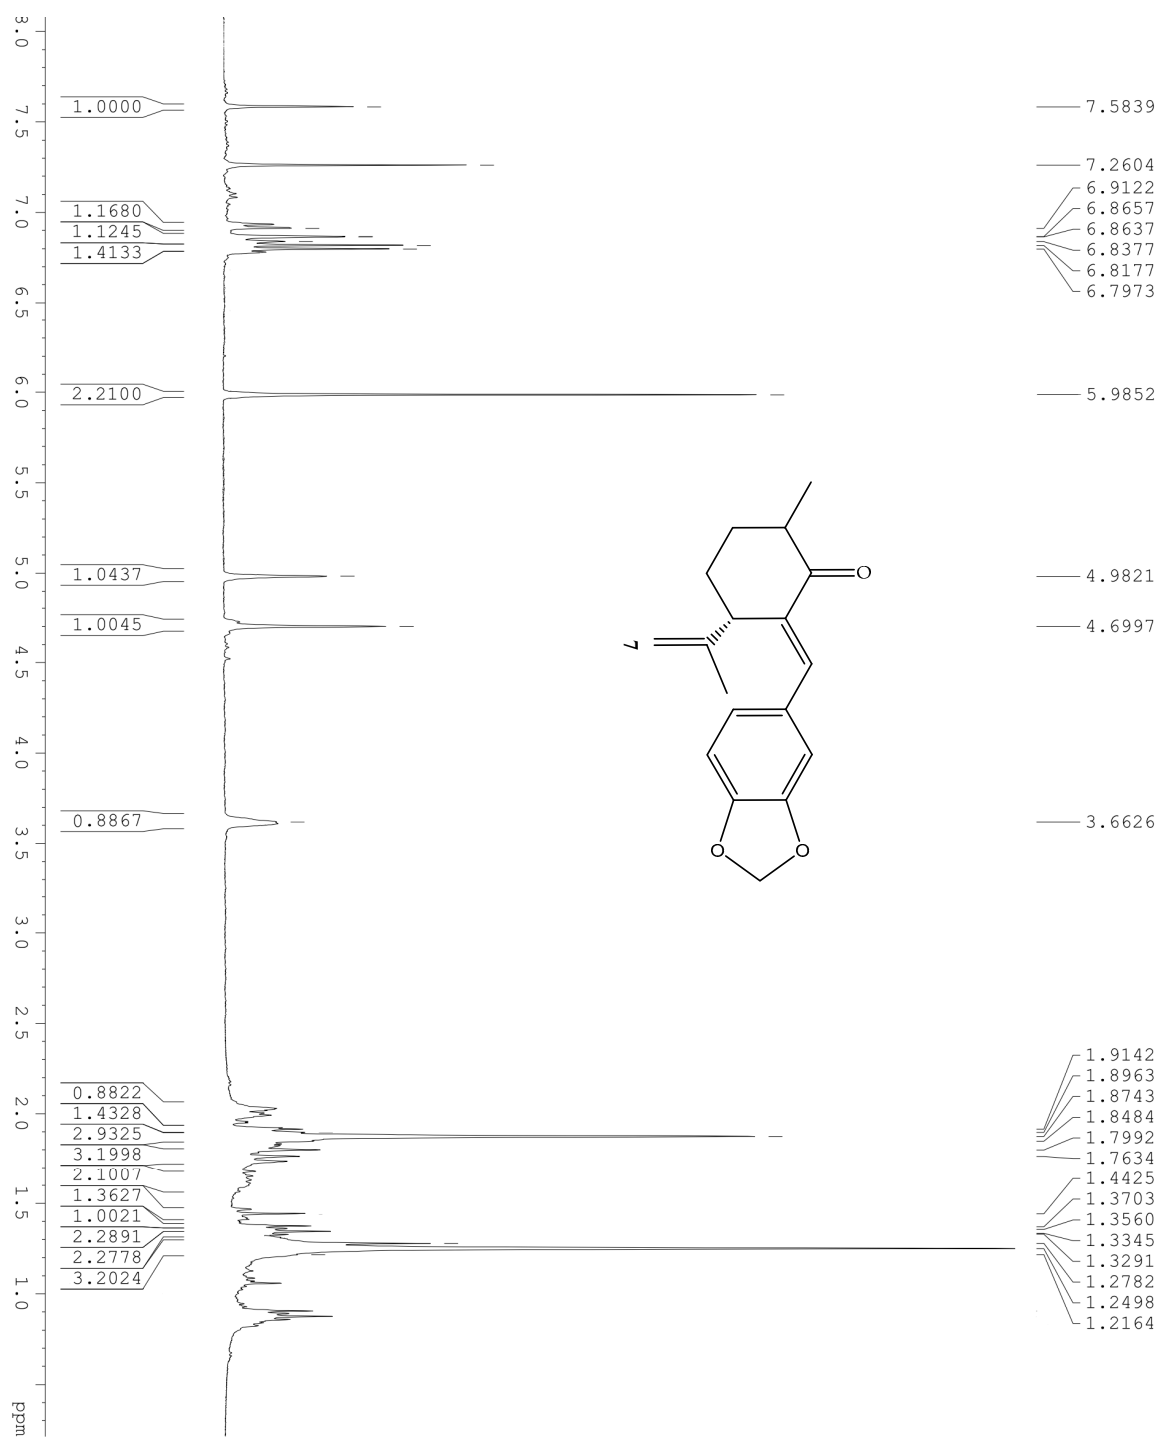

$^{13}\text{C}$  NMR (100 MHz,  $\text{CDCl}_3$ ) spectrum of compound 7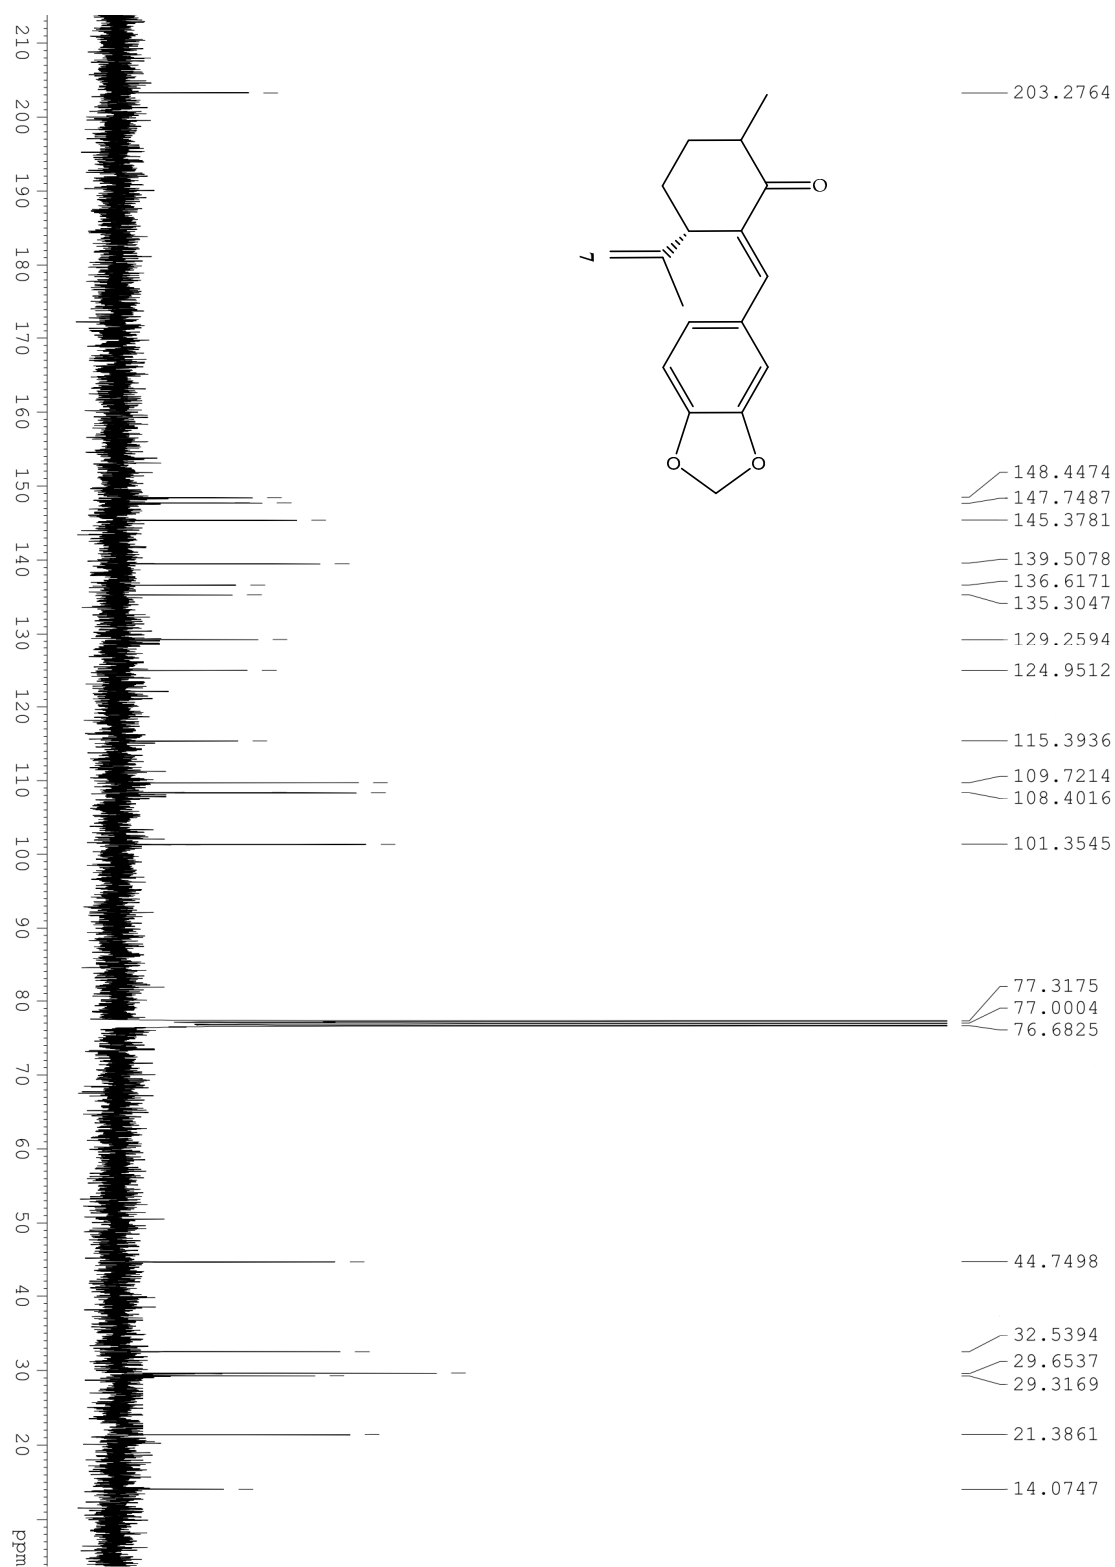

**HRMS of compound 7**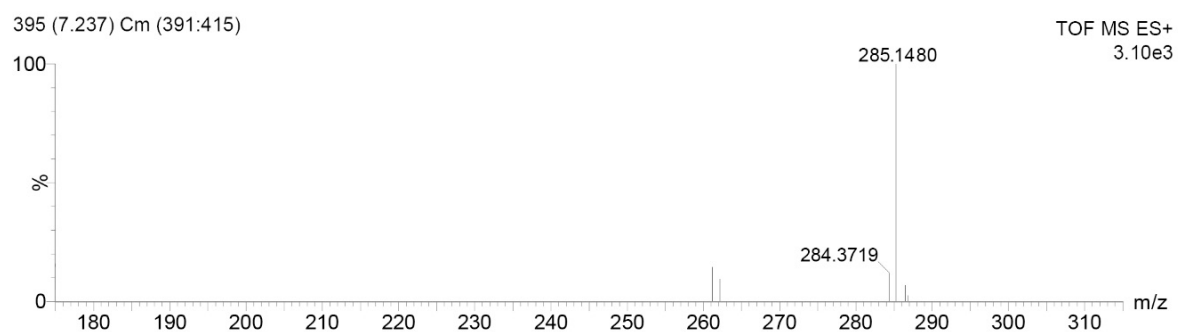

## FT-IR of compounds 8

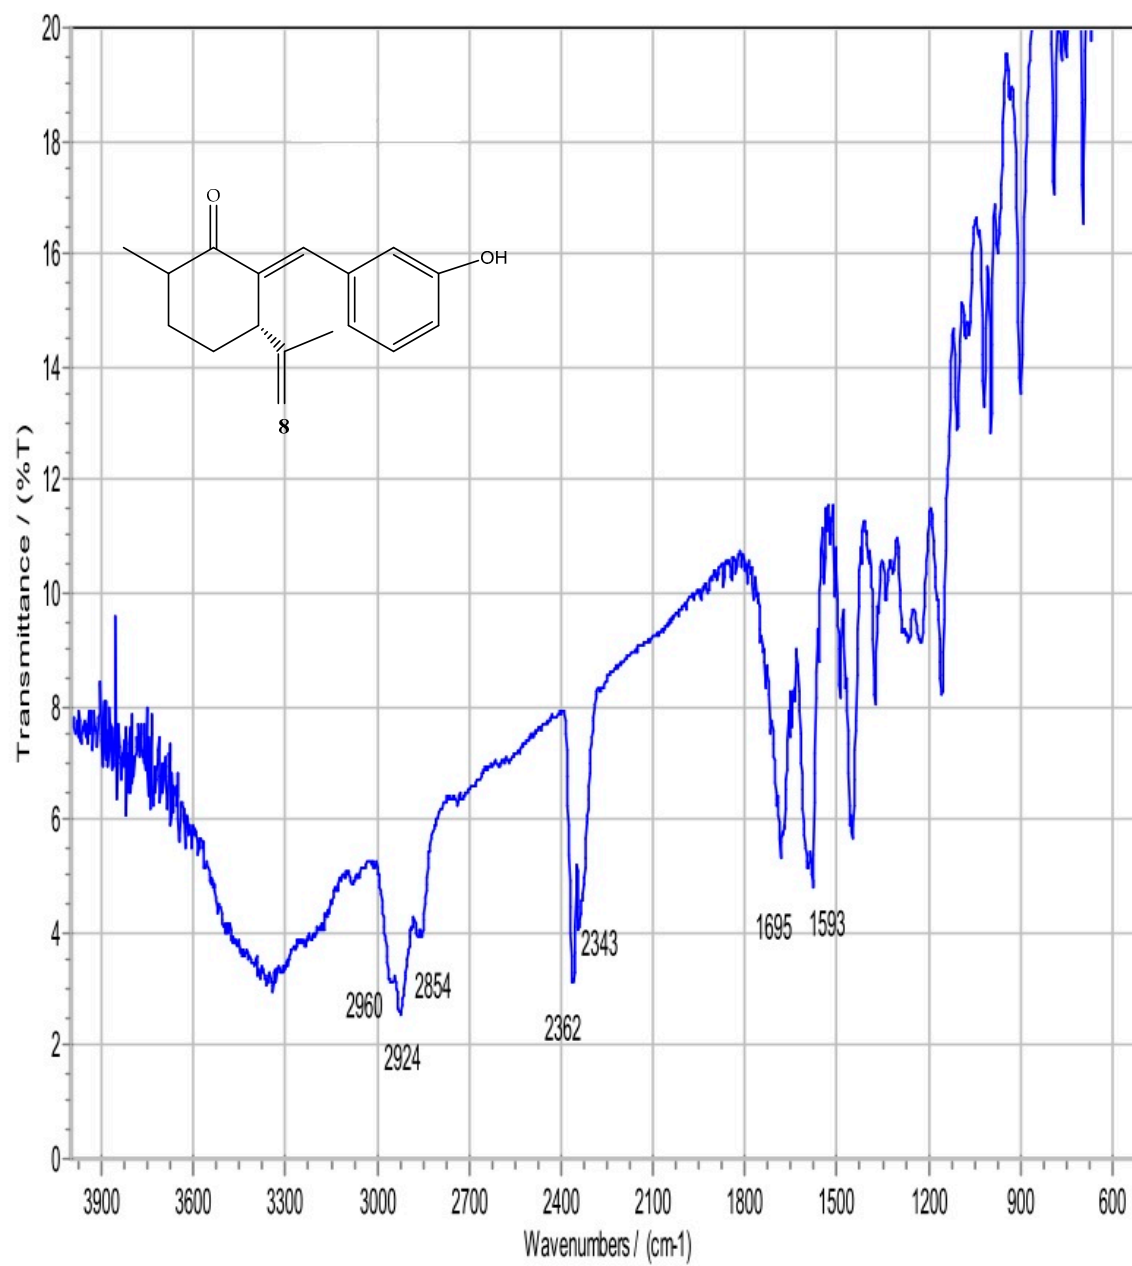

Instrument model=WQF-520 resolution=4 scan times=64

<sup>1</sup>H NMR (400 MHz, CDCl<sub>3</sub>) spectrum of compound 8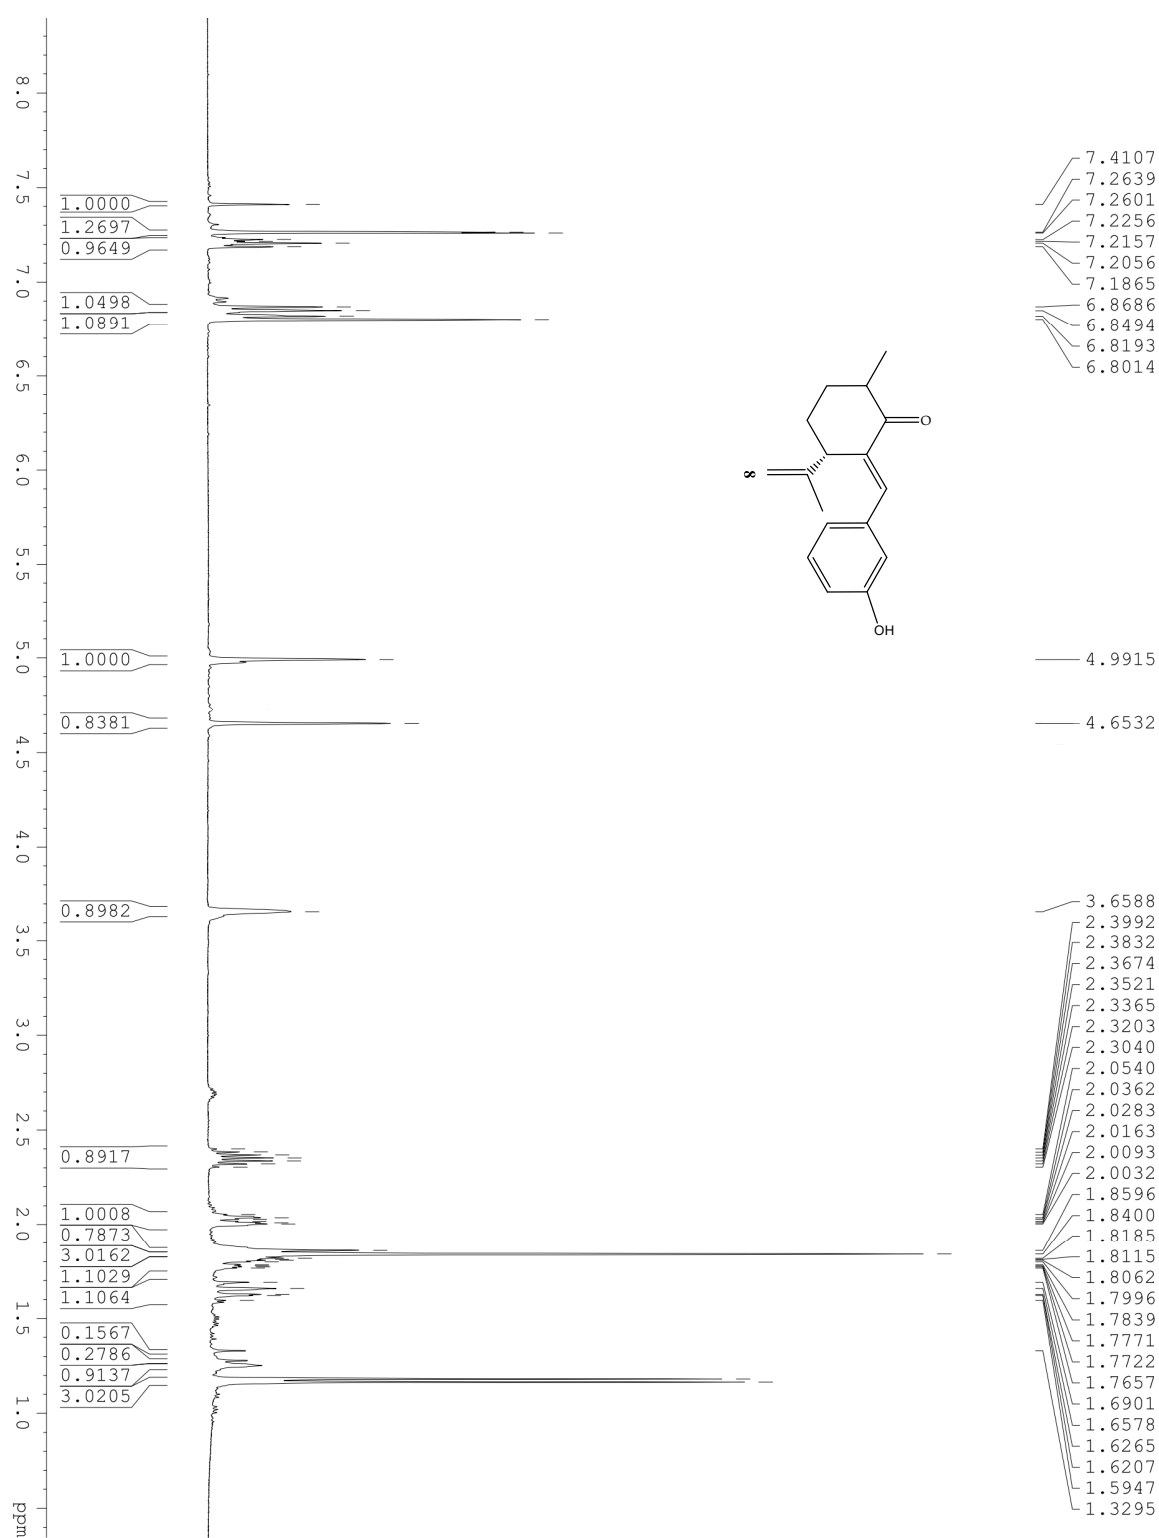

$^{13}\text{C}$  NMR (100 MHz,  $\text{CDCl}_3$ ) spectrum of compound 8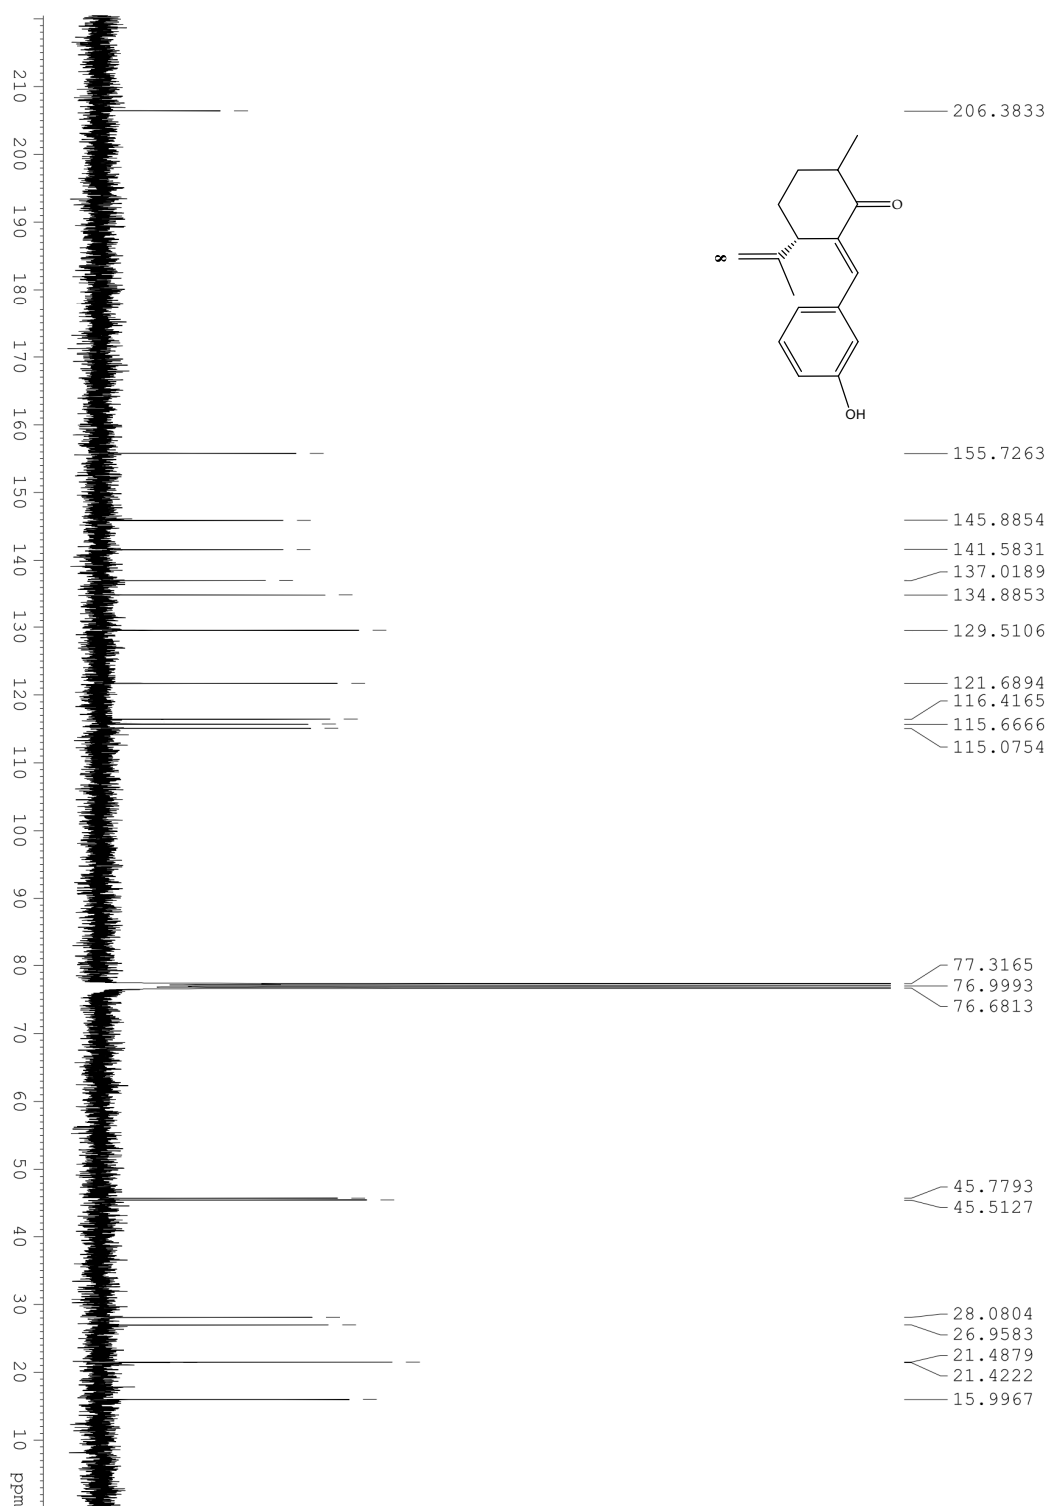



## HRMS of compound 8

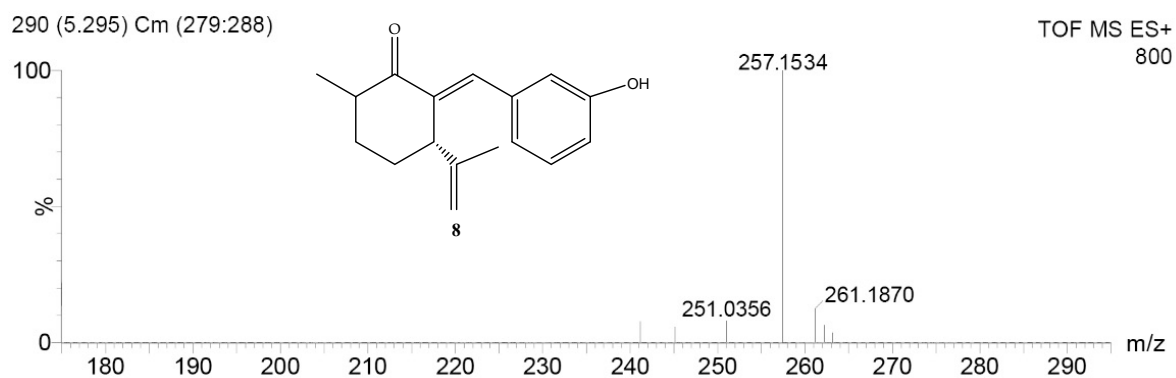

Supplement: s1 [file s1]
